# Supplementary material for: The population-level impact of Enterococcus faecalis genetics on intestinal colonization and extraintestinal infection
Source: PubMed Central journal article supplement (PMC10714801; doi:10.1128/spectrum.00201-23), 2023-10-09
Supplement: spectrum.00201-23-s0002.pdf [file spectrum.00201-23-s0002.pdf]

# The population-level impact of *Enterococcus faecalis* genetics on intestinal colonisation and extraintestinal infection

Chrispin Chaguza, Anna K. Pöntinen, Janetta Top, Sergio Arredondo-Alonso, Ana R. Freitas, Carla Novais, Carmen Torres, Stephen D. Bentley, Luisa Peixe, Teresa M. Coque, Rob J.L. Willems, and Jukka Corander

**Supplementary Table 1. Relative abundance of *E. faecalis* clades or lineages by individuals' hospitalisation status and isolation source.**

| PopPUNK clade | Proportion by isolation source |                | Bonferroni adjusted <i>P</i> -value | Proportion by hospitalisation status |                  | Bonferroni adjusted <i>P</i> -value |
|---------------|--------------------------------|----------------|-------------------------------------|--------------------------------------|------------------|-------------------------------------|
|               | Blood                          | Faeces         |                                     | Hospitalised                         | Non-hospitalised |                                     |
| 1             | 0.11 (55/499)                  | 0.17 (43/251)  | 0.026                               | 0.1 (45/452)                         | 0.18 (53/298)    | 0.0027                              |
| 11            | 0.016 (8/499)                  | 0.008 (2/251)  | 0.57                                | 0.015 (7/452)                        | 0.01 (3/298)     | 0.76                                |
| 13            | 0.036 (18/499)                 | 0.024 (6/251)  | 0.5                                 | 0.035 (16/452)                       | 0.027 (8/298)    | 0.66                                |
| 15            | 0.02 (10/499)                  | 0.012 (3/251)  | 0.61                                | 0.02 (9/452)                         | 0.013 (4/298)    | 0.7                                 |
| 16            | 0.012 (6/499)                  | 0.024 (6/251)  | 0.36                                | 0.011 (5/452)                        | 0.023 (7/298)    | 0.3                                 |
| 17            | 0.02 (10/499)                  | 0.032 (8/251)  | 0.46                                | 0.022 (10/452)                       | 0.027 (8/298)    | 0.87                                |
| 2             | 0.16 (80/499)                  | 0.024 (6/251)  | 6.30E-08                            | 0.16 (71/452)                        | 0.05 (15/298)    | 1.20E-05                            |
| 20            | 0.02 (10/499)                  | 0 (0/251)      | 0.055                               | 0.022 (10/452)                       | 0 (0/298)        | 0.024                               |
| 22            | 0.01 (5/499)                   | 0.02 (5/251)   | 0.44                                | 0.011 (5/452)                        | 0.017 (5/298)    | 0.73                                |
| 3             | 0.082 (41/499)                 | 0.06 (15/251)  | 0.34                                | 0.088 (40/452)                       | 0.054 (16/298)   | 0.1                                 |
| 4             | 0.034 (17/499)                 | 0.19 (48/251)  | 1.40E-12                            | 0.033 (15/452)                       | 0.17 (50/298)    | 3.40E-10                            |
| 5             | 0.038 (19/499)                 | 0.048 (12/251) | 0.66                                | 0.04 (18/452)                        | 0.044 (13/298)   | 0.95                                |
| 6             | 0.12 (58/499)                  | 0 (0/251)      | 4.30E-08                            | 0.12 (55/452)                        | 0.01 (3/298)     | 4.80E-08                            |
| 7             | 0.056 (28/499)                 | 0.008 (2/251)  | 0.0029                              | 0.062 (28/452)                       | 0.0067 (2/298)   | 0.00033                             |
| 8             | 0.03 (15/499)                  | 0.036 (9/251)  | 0.84                                | 0.029 (13/452)                       | 0.037 (11/298)   | 0.68                                |
| 9             | 0.026 (13/499)                 | 0.028 (7/251)  | 1                                   | 0.02 (9/452)                         | 0.037 (11/298)   | 0.24                                |

**Supplementary Table 2. Relative abundance of *E. faecalis* sequence types (ST) and virulence factors by individuals' hospitalisation status and isolation source.**

| Sequence type (ST) | Proportion by isolation source |                | Bonferroni adjusted <i>P</i> -value | Proportion by hospitalisation status |                  | Bonferroni adjusted <i>P</i> -value |
|--------------------|--------------------------------|----------------|-------------------------------------|--------------------------------------|------------------|-------------------------------------|
|                    | Blood                          | Faeces         |                                     | Hospitalised                         | Non-hospitalised |                                     |
| ST16               | 0.076 (38/499)                 | 0.06 (15/251)  | 0.5                                 | 0.082 (37/452)                       | 0.054 (16/298)   | 0.18                                |
| ST179              | 0.026 (13/499)                 | 0.028 (7/251)  | 1                                   | 0.02 (9/452)                         | 0.037 (11/298)   | 0.24                                |
| ST21               | 0.038 (19/499)                 | 0.06 (15/251)  | 0.25                                | 0.038 (17/452)                       | 0.057 (17/298)   | 0.28                                |
| ST25               | 0.012 (6/499)                  | 0.068 (17/251) | 7.80E-05                            | 0.013 (6/452)                        | 0.057 (17/298)   | 0.0014                              |
| ST28               | 0.11 (53/499)                  | 0 (0/251)      | 1.90E-07                            | 0.12 (52/452)                        | 0.0034 (1/298)   | 1.20E-08                            |
| ST34               | 0.028 (14/499)                 | 0.02 (5/251)   | 0.67                                | 0.029 (13/452)                       | 0.02 (6/298)     | 0.62                                |
| ST40               | 0.044 (22/499)                 | 0.092 (23/251) | 0.015                               | 0.04 (18/452)                        | 0.091 (27/298)   | 0.0068                              |
| ST55               | 0.038 (19/499)                 | 0.024 (6/251)  | 0.42                                | 0.033 (15/452)                       | 0.034 (10/298)   | 1                                   |
| ST6                | 0.15 (76/499)                  | 0.024 (6/251)  | 2.10E-07                            | 0.15 (68/452)                        | 0.047 (14/298)   | 1.50E-05                            |
| ST64               | 0.024 (12/499)                 | 0.024 (6/251)  | 1                                   | 0.024 (11/452)                       | 0.023 (7/298)    | 1                                   |
| ST9                | 0.038 (19/499)                 | 0.008 (2/251)  | 0.034                               | 0.042 (19/452)                       | 0.0067 (2/298)   | 0.0082                              |

**Supplementary Table 3. Relative abundance of *E. faecalis* virulence factors by individuals' hospitalisation status and isolation source.**

| Gene             | Type      | Proportion by isolation source |                | Bonferroni adjusted <i>P</i> -value | Proportion by hospitalisation status |                  | Bonferroni adjusted <i>P</i> -value |
|------------------|-----------|--------------------------------|----------------|-------------------------------------|--------------------------------------|------------------|-------------------------------------|
|                  |           | Blood                          | Faeces         |                                     | Hospitalised                         | Non-hospitalised |                                     |
| <i>ace</i>       | Adherence | 1.00 (439/440)                 | 1.00 (296/296) | 1                                   | 1.00 (484/485)                       | 1.00 (251/251)   | 1                                   |
| <i>ebpA</i>      | Adherence | 0.99 (437/440)                 | 1.00 (296/296) | 0.4                                 | 0.99 (482/485)                       | 1.00 (251/251)   | 0.52                                |
| <i>ebpB</i>      | Adherence | 1.00 (438/440)                 | 1.00 (296/296) | 0.66                                | 1.00 (483/485)                       | 1.00 (251/251)   | 0.79                                |
| <i>ebpC</i>      | Adherence | 1.00 (438/440)                 | 1.00 (296/296) | 0.66                                | 1.00 (483/485)                       | 1.00 (251/251)   | 0.79                                |
| <i>ecbA_fss3</i> | Adherence | 0.55 (240/440)                 | 0.38 (113/296) | 1.80E-05                            | 0.55 (268/485)                       | 0.34 (85/251)    | 5.70E-08                            |
| EF0149           | Adherence | 0.68 (297/440)                 | 0.55 (163/296) | 0.00084                             | 0.67 (323/485)                       | 0.55 (137/251)   | 0.0019                              |
| EF0485           | Adherence | 0.68 (297/440)                 | 0.55 (164/296) | 0.0012                              | 0.67 (323/485)                       | 0.55 (138/251)   | 0.0026                              |
| <i>efaA</i>      | Adherence | 1.00 (440/440)                 | 1.00 (296/296) | 1                                   | 1.00 (485/485)                       | 1.00 (251/251)   | 1                                   |
| <i>srtC</i>      | Adherence | 1.00 (438/440)                 | 1.00 (296/296) | 0.66                                | 1.00 (483/485)                       | 1.00 (251/251)   | 0.79                                |
| <i>bopD</i>      | Biofilm   | 1.00 (440/440)                 | 1.00 (296/296) | 1                                   | 1.00 (485/485)                       | 1.00 (251/251)   | 1                                   |
| <i>fsrA</i>      | Biofilm   | 0.57 (249/440)                 | 0.51 (152/296) | 0.19                                | 0.57 (276/485)                       | 0.50 (125/251)   | 0.079                               |
| <i>fsrB</i>      | Biofilm   | 0.58 (254/440)                 | 0.52 (154/296) | 0.15                                | 0.58 (281/485)                       | 0.51 (127/251)   | 0.069                               |
| <i>fsrC</i>      | Biofilm   | 0.86 (378/440)                 | 0.77 (229/296) | 0.0038                              | 0.86 (416/485)                       | 0.76 (191/251)   | 0.0015                              |

|               |                   |                |                |          |                |                |          |
|---------------|-------------------|----------------|----------------|----------|----------------|----------------|----------|
| EF0818        | Exoenzyme         | 0.68 (297/440) | 0.61 (180/296) | 0.074    | 0.68 (331/485) | 0.58 (146/251) | 0.0085   |
| EF3023        | Exoenzyme         | 0.79 (349/440) | 0.86 (255/296) | 0.023    | 0.79 (385/485) | 0.87 (219/251) | 0.011    |
| <i>gelE</i>   | Exoenzyme         | 0.86 (379/440) | 0.78 (232/296) | 0.0081   | 0.86 (418/485) | 0.77 (193/251) | 0.0021   |
| <i>sprE</i>   | Exoenzyme         | 0.88 (388/440) | 0.81 (240/296) | 0.01     | 0.88 (428/485) | 0.80 (200/251) | 0.0027   |
| <i>cylL-l</i> | Exotoxin          | 0.37 (163/440) | 0.23 (67/296)  | 5.00E-05 | 0.37 (181/485) | 0.20 (49/251)  | 1.20E-06 |
| <i>cylL-s</i> | Exotoxin          | 0.37 (163/440) | 0.23 (67/296)  | 5.00E-05 | 0.37 (181/485) | 0.20 (49/251)  | 1.20E-06 |
| <i>cylM</i>   | Exotoxin          | 0.37 (163/440) | 0.23 (67/296)  | 5.00E-05 | 0.37 (181/485) | 0.20 (49/251)  | 1.20E-06 |
| <i>cylR2</i>  | Exotoxin          | 0.37 (163/440) | 0.23 (67/296)  | 5.00E-05 | 0.37 (181/485) | 0.20 (49/251)  | 1.20E-06 |
| <i>cpsA</i>   | Immune modulation | 1.00 (440/440) | 1.00 (296/296) | 1        | 1.00 (485/485) | 1.00 (251/251) | 1        |
| <i>cpsB</i>   | Immune modulation | 1.00 (440/440) | 1.00 (296/296) | 1        | 1.00 (485/485) | 1.00 (251/251) | 1        |
| <i>cpsC</i>   | Immune modulation | 0.63 (276/440) | 0.41 (120/296) | 5.10E-09 | 0.61 (298/485) | 0.39 (98/251)  | 1.20E-08 |
| <i>cpsD</i>   | Immune modulation | 0.63 (276/440) | 0.40 (119/296) | 3.00E-09 | 0.61 (298/485) | 0.39 (97/251)  | 6.60E-09 |
| <i>cpsE</i>   | Immune modulation | 0.63 (276/440) | 0.40 (119/296) | 3.00E-09 | 0.61 (298/485) | 0.39 (97/251)  | 6.60E-09 |
| <i>cpsF</i>   | Immune modulation | 0.44 (194/440) | 0.27 (79/296)  | 2.40E-06 | 0.44 (211/485) | 0.25 (62/251)  | 8.40E-07 |
| <i>cpsG</i>   | Immune modulation | 0.63 (276/440) | 0.40 (119/296) | 3.00E-09 | 0.61 (298/485) | 0.39 (97/251)  | 6.60E-09 |

|             |                   |                |                |          |                |               |          |
|-------------|-------------------|----------------|----------------|----------|----------------|---------------|----------|
| <i>cpsH</i> | Immune modulation | 0.63 (276/440) | 0.40 (119/296) | 3.00E-09 | 0.61 (298/485) | 0.39 (97/251) | 6.60E-09 |
| <i>cpsI</i> | Immune modulation | 0.63 (276/440) | 0.41 (120/296) | 5.10E-09 | 0.61 (298/485) | 0.39 (98/251) | 1.20E-08 |
| <i>cpsJ</i> | Immune modulation | 0.63 (276/440) | 0.41 (120/296) | 5.10E-09 | 0.61 (298/485) | 0.39 (98/251) | 1.20E-08 |
| <i>cpsK</i> | Immune modulation | 0.63 (276/440) | 0.41 (120/296) | 5.10E-09 | 0.61 (298/485) | 0.39 (98/251) | 1.20E-08 |

**Supplementary Table 4. The abundance of *E. faecalis* antibiotic resistance genes by individuals' hospitalisation status and isolation source.**

| Antibiotic     | Body isolation source |                | Bonferroni adjusted P-value | Hospitalisation status |                  | Bonferroni adjusted P-value |
|----------------|-----------------------|----------------|-----------------------------|------------------------|------------------|-----------------------------|
|                | Blood                 | Faeces         |                             | Hospitalised           | Non-hospitalised |                             |
| Aminoglycoside | 0.51 (225/440)        | 0.28 (84/296)  | 5.51E-09                    | 0.51 (247/485)         | 0.25 (62/251)    | 5.69E-11                    |
| Linezolid      | 0 (0/440)             | 0 (0/296)      | 1                           | 0 (0/485)              | 0 (0/251)        | 1                           |
| Macrolide      | 0.53 (233/440)        | 0.3 (88/296)   | 3.77E-09                    | 0.53 (256/485)         | 0.26 (65/251)    | 2.70E-11                    |
| Phenicol       | 0.29 (127/440)        | 0.16 (46/296)  | 8.59E-05                    | 0.28 (136/485)         | 0.15 (37/251)    | 0.00016145                  |
| Tetracycline   | 0.75 (328/440)        | 0.59 (176/296) | 6.75E-05                    | 0.75 (364/485)         | 0.56 (140/251)   | 4.52E-07                    |
| Vancomycin     | 0.0091 (4/440)        | 0.027 (8/296)  | 0.11246715                  | 0.016 (8/485)          | 0.016 (4/251)    | 1                           |

\*All the values in the contingency table were increased by a value of 1 to avoid division by zero when calculating the *P*-values.

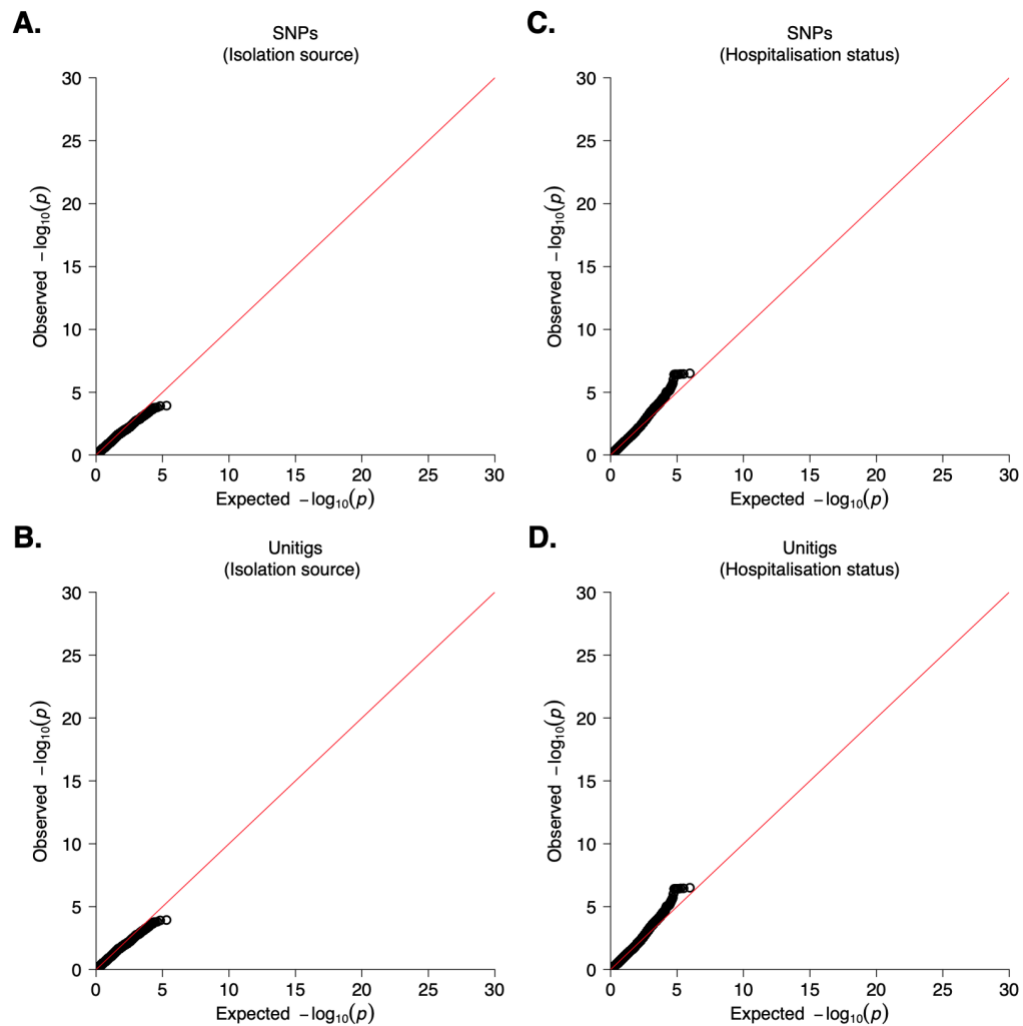

**Supplementary Figure 1. Quantile-quantile plots for the genome-wide association (GWA) of *E. faecalis* body isolation site and hospitalisation status.** (A) QQ-plot of GWA based on SNPs for the isolation source phenotype. (B) QQ-plot of GWA based on unitigs for the isolation source phenotype. (C) QQ-plot of GWA based on SNPs for the hospitalisation status phenotype. (D) QQ-plot of GWA based on unitigs for the hospitalisation status phenotype.
